# Supplementary material
Source: PubMed Central journal article supplement (PMC2483356)
Supplement: tpc.108.060731_1.pdf [file tpc.108.060731_1.pdf]

Supplemental Data. Henquet et al. (2008). Identification of the gene encoding the  $\alpha$ 1,3-mannosyltransferase (ALG3) in *Arabidopsis* and characterization of downstream N-glycan processing.

|                                               |      |
|-----------------------------------------------|------|
| M A G A S S P A S L R A S R S R R L G K 20    |      |
| E T N R S D L F K K P A V P F A F A L I 40    | TM1  |
| L A D A I L V A L I I A Y V P Y T K I D 60    |      |
| W D A Y M S Q V S G F L G G E R D Y G N 80    | TM2  |
| L K G D T G P L V Y P A G F L Y V Y S A 100   |      |
| V Q N L T G G E V Y P A Q I L F G V L Y 120   | TM3  |
| I V N L G I V L I I Y V K T D V V P W W 140   |      |
| A L S L L C L S K R I H S I F V L R L F 160   | TM4  |
| N D C F A M T L L H A S M A L F L Y R K 180   |      |
| W H L G M L V F S G A V S V K M N V L L 200   | TM5  |
| Y A P T L L L L L L L K A M N I I G V V S 220 | TM6  |
| A L A G A A L V Q I L V G L P F L I T Y 240   |      |
| P V S Y I A N A F D L G R V F I H F W S 260   |      |
| V N F K F V P E R V F V S K E F A V C L 280   | TM7  |
| L I A H L F L L V A F A N Y K W C K H E 300   |      |
| G G I I G F M R S R H F F L T L P S S L 320   |      |
| S F S D V S A S R I I T K E H V V T A M 340   | TM8  |
| F V G N F I G I V F A R S L H Y Q F Y S 360   |      |
| W Y F Y S L P Y L L W R T P F P T W L R 380   | TM9  |
| L I M F L G I E L C W N V Y P S T P S S 400   |      |
| S G L L L C L H L I I L V G L W L A P S 420   | TM10 |
| V D P Y Q L K E H P K S Q I H K K A 438       |      |

**Supplemental Figure 1.** At ALG3 topology

Ten transmembrane domains (TM1-TM10) were predicted by a transmembrane prediction program TMHMM Server (v2.0). Transmembrane domains are labelled red.



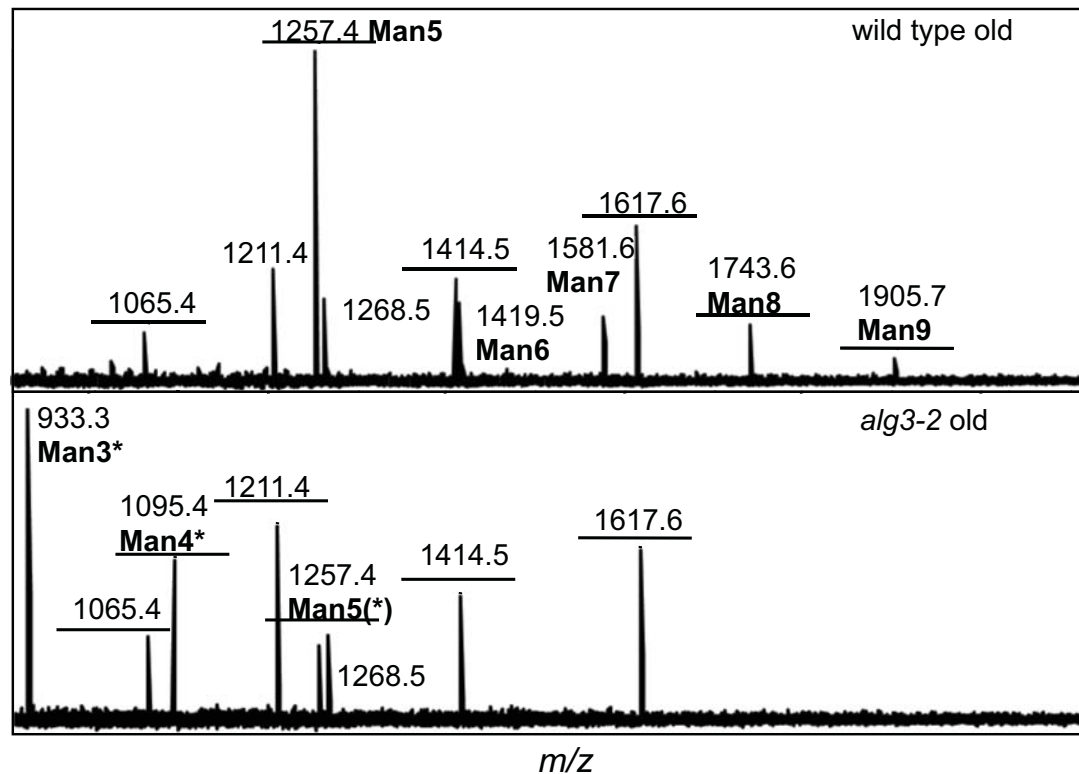

**Supplemental Figure 3.** MALDI-TOF spectra of released N-linked glycans from wild-type and *alg3-2* mutant plants.

Spectra of N-glycans isolated from *Arabidopsis thaliana* wild-type (upper panel) and *alg3-2* mutant leaves (lower panel). The labelled peaks represent  $[M+Na]^+$  ions. Only the mannose type peaks are marked. See Table I for N-glycan abbreviations.
